# Supplementary material for: Evaluation of a National Comprehensive Cancer Network Guidelines–Based Decision Support Tool in Patients With Non–Small Cell Lung Cancer: A Nonrandomized Clinical Trial
Source: PubMed Central journal article supplement (PMC7527870; doi:10.1001/jamanetworkopen.2020.9750), 2020-09-30
Supplement: jamanetwopen-e209750-s002.pdf [file jamanetwopen-e209750-s002.pdf]

## Supplementary Online Content

Wu SY, Lazar AA, Gubens MA, et al. Evaluation of a National Comprehensive Cancer Network guidelines–based decision support tool in patients with non–small cell lung cancer: a nonrandomized clinical trial. *JAMA Netw Open*. 2020;3(9):e209750. doi:10.1001/jamanetworkopen.2020.9750

**eTable 1.** FACT-L Scores With and Without Multiple Imputation by Chained Equations Using 20 Imputation Datasets

**eTable 2.** Decisional Conflict Scale (DCS) Scores Before and After Consultation Incorporating Web-Based Access to Non–Small Cell Lung Cancer Guidelines: A Pooled Analysis Using 20 Imputation Data Sets

**eTable 3.** Treatment Including Surgery, Radiation and Chemotherapy in the Trial Cohort and Retrospective Cohort

**eTable 4.** Distribution of Active Smokers by Clinical Stage

**eTable 5.** Patients Included in Each Benchmark Analysis by Self-Reported Race/Ethnicity

**eAppendix.** Post-Consultation Questionnaire

This supplementary material has been provided by the authors to give readers additional information about their work.

**eTable 1.** FACT-L scores with and without multiple imputation by chained equations using 20 imputation datasets

| <b>FACT-L Subscore</b>     | <b>Original score, median (IQR)</b> | <b>Pooled scores, median (IQR)</b> |
|----------------------------|-------------------------------------|------------------------------------|
| <b>Physical subscore</b>   | 7 (3-11)                            | 7 (2-11)                           |
| <b>Social subscore</b>     | 20 (15-24)                          | 20 (15-24)                         |
| <b>Emotional subscore</b>  | 8 (6-11)                            | 8 (6-10)                           |
| <b>Functional subscore</b> | 15 (12-20)                          | 15 (11-20)                         |
| <b>Additional subscore</b> | 15 (14-19)                          | 15 (14-19)                         |
| <b>Total subscore</b>      | 67 (61-75)                          | 67 (61-75)                         |

**eTable 2.** Decisional Conflict Scale (DCS) scores before and after consultation incorporating web-based access to non-small cell lung cancer guidelines: a pooled analysis using 20 imputation data sets

| <b>Subscore</b>      | <b>Pre-consultation, median (IQR)</b> | <b>Post-consultation, median (IQR)</b> | <b>Change, median (IQR)</b> | <b>P value</b> |
|----------------------|---------------------------------------|----------------------------------------|-----------------------------|----------------|
| Informed subscore    | 50 (25-58)                            | 25 (0-33)                              | 25 (0-42)                   | < 0.001        |
| Clarity subscore     | 50 (33-58)                            | 25 (8-33)                              | 22 (0-50)                   | < 0.001        |
| Support subscore     | 25 (17-50)                            | 17 (0-25)                              | 8 (0-25)                    | < 0.001        |
| Uncertainty subscore | 50 (25-75)                            | 25 (0-45)                              | 25 (0-50)                   | < 0.001        |
| Effective subscore   | 50 (25-50)                            | 25 (0-40)                              | 13 (0-44)                   | < 0.001        |
| <b>Total score</b>   | 44 (30-53)                            | 25 (9-33)                              | 18 (5-34)                   | < 0.001        |

**eTable 3.** Treatment including surgery, radiation and chemotherapy in the trial cohort and retrospective cohort

| <b>Treatment</b>                                        | <b>Trial cohort (N, %<sup>a</sup> of 76)</b> | <b>Pre-trial cohort (N, %<sup>a</sup> of 157)</b> |
|---------------------------------------------------------|----------------------------------------------|---------------------------------------------------|
| Surgical resection                                      | 14 (18.4%)                                   | 58 (36.9%)                                        |
| Radiation to primary +/- nodes                          | 40 (52.6%)                                   | 89 (56.7%)                                        |
| Use of chemotherapy                                     |                                              |                                                   |
| Neoadjuvant                                             | 7 (9.2%)                                     | 6 (3.8%)                                          |
| Concurrent with radiation (+/- neoadjuvant or adjuvant) | 13 (17.1%)                                   | 41 (26.1%)                                        |
| Adjuvant                                                | 1 (1.3%)                                     | 15 (9.6%)                                         |
| Neoadjuvant and Adjuvant                                | 0 (0.0%)                                     | 3 (1.9%)                                          |
| Palliative                                              | 13 (17.1%)                                   | 40 (25.5%)                                        |

<sup>a</sup> Percentages may not add to 100 due to rounding

\*As this was not intended to be compared between the two cohorts, no p-values provided

**eTable 4.** Distribution of active smokers by clinical stage

| <b>Stage</b> | <b>Trial cohort (N, %<sup>a</sup> of 76)</b> | <b>Pre-trial cohort (N, %<sup>a</sup> of 157)</b> | <b>P-value</b> |
|--------------|----------------------------------------------|---------------------------------------------------|----------------|
| <b>I</b>     | 2 (2.6%)                                     | 5 (3.2%)                                          | 0.40           |
| <b>II</b>    | 1 (1.3%)                                     | 1 (0.6%)                                          |                |
| <b>III</b>   | 1 (1.3%)                                     | 11 (7.0%)                                         |                |
| <b>IV</b>    | 1 (1.3%)                                     | 7 (4.5%)                                          |                |

**eTable 5. Patients Included in Each Benchmark Analysis by Self-reported Race/Ethnicity**

| <b>Benchmark</b>                                                                                                                       | <b>Trial cohort</b> | <b>Pre-trial cohort</b> | <b>P - value</b> |
|----------------------------------------------------------------------------------------------------------------------------------------|---------------------|-------------------------|------------------|
| Benchmark 1: Documented smoking cessation counseling or intervention in active smokers                                                 |                     |                         | 0.11             |
| White                                                                                                                                  | 1                   | 13                      |                  |
| Black                                                                                                                                  | 3                   | 3                       |                  |
| Asian                                                                                                                                  | 0                   | 2                       |                  |
| Other/Declined                                                                                                                         | 1                   | 6                       |                  |
| <b>Total</b>                                                                                                                           | <b>5</b>            | <b>24</b>               |                  |
| Benchmark 2: Adjuvant chemotherapy for patients with stage IB-IIB disease following surgery                                            |                     |                         | 0.43             |
| White                                                                                                                                  |                     |                         |                  |
| Black                                                                                                                                  | 5                   | 9                       |                  |
| Asian                                                                                                                                  | 0                   | 0                       |                  |
| Other/Declined                                                                                                                         | 2                   | 1                       |                  |
| Total                                                                                                                                  | 0                   | 1                       |                  |
|                                                                                                                                        | <b>7</b>            | <b>11</b>               |                  |
| Benchmark 3: Pathologic mediastinal staging completed prior to surgery for patients with stage III disease                             |                     |                         | 0.68             |
| White                                                                                                                                  | 2                   | 8                       |                  |
| Black                                                                                                                                  | 0                   | 2                       |                  |
| Asian                                                                                                                                  | 0                   | 2                       |                  |
| Other/Declined                                                                                                                         | 0                   | 2                       |                  |
| Total                                                                                                                                  | <b>2</b>            | <b>14</b>               |                  |
| Benchmark 4: Pathologic mediastinal staging prior to initiation of treatment in patients with stage III disease not undergoing surgery |                     |                         | 0.38             |
| White                                                                                                                                  | 10                  | 12                      |                  |
| Black                                                                                                                                  | 3                   | 3                       |                  |
| Asian                                                                                                                                  | 0                   | 5                       |                  |
| Other/Declined                                                                                                                         | 1                   | 14                      |                  |
| Total                                                                                                                                  | <b>14</b>           | <b>34</b>               |                  |
| Benchmark 5: Upfront chemoradiation for patients with stage III disease not undergoing surgery                                         |                     |                         | 0.55             |
| White                                                                                                                                  | 10                  | 12                      |                  |
| Black                                                                                                                                  | 3                   | 3                       |                  |
| Asian                                                                                                                                  | 0                   | 5                       |                  |
| Other/Declined                                                                                                                         | 1                   | 14                      |                  |
| Total                                                                                                                                  | <b>14</b>           | <b>34</b>               |                  |
| Benchmark 6: Testing for EGFR or ALK alteration status in patients with stage IV disease                                               |                     |                         | 0.22             |
| White                                                                                                                                  |                     |                         |                  |
| Black                                                                                                                                  | 12                  | 35                      |                  |
| Asian                                                                                                                                  | 2                   | 3                       |                  |
| Other/Declined                                                                                                                         | 7                   | 11                      |                  |
| Total                                                                                                                                  | <b>2</b>            | <b>11</b>               |                  |
|                                                                                                                                        | <b>23</b>           | <b>60</b>               |                  |

## eAppendix. Post-Consultation Questionnaire

1. Treatment options discussed:

- |                                            |                                           |
|--------------------------------------------|-------------------------------------------|
| <input type="checkbox"/> Surgery           | <input type="checkbox"/> Observation      |
| <input type="checkbox"/> Radiation Therapy | <input type="checkbox"/> Hospice          |
| <input type="checkbox"/> Chemotherapy      | <input type="checkbox"/> No Treatment     |
| <input type="checkbox"/> Don't Know        | <input type="checkbox"/> Targeted Therapy |

2. Treatment recommended:

- |                                            |                                           |
|--------------------------------------------|-------------------------------------------|
| <input type="checkbox"/> Surgery           | <input type="checkbox"/> Observation      |
| <input type="checkbox"/> Radiation Therapy | <input type="checkbox"/> Hospice          |
| <input type="checkbox"/> Chemotherapy      | <input type="checkbox"/> No Treatment     |
| <input type="checkbox"/> Don't Know        | <input type="checkbox"/> Targeted Therapy |

3. Treatment selected:

- |                                            |                                           |
|--------------------------------------------|-------------------------------------------|
| <input type="checkbox"/> Surgery           | <input type="checkbox"/> Observation      |
| <input type="checkbox"/> Radiation Therapy | <input type="checkbox"/> Hospice          |
| <input type="checkbox"/> Chemotherapy      | <input type="checkbox"/> No Treatment     |
| <input type="checkbox"/> Don't Know        | <input type="checkbox"/> Targeted Therapy |

4. Survival prognosis with no treatment: \_\_\_\_\_ years \_\_\_\_\_ months

5. Survival prognosis with recommended treatment: \_\_\_\_\_ years \_\_\_\_\_ months

6. Expected tolerance of proposed treatment plan:

- |                       |                       |                       |                       |                       |
|-----------------------|-----------------------|-----------------------|-----------------------|-----------------------|
| Not Tolerated         | Poorly Tolerated      | Don't Know            | Somewhat Tolerated    | Well Tolerated        |
| <input type="radio"/> | <input type="radio"/> | <input type="radio"/> | <input type="radio"/> | <input type="radio"/> |

7. Your satisfaction with the medical encounter:

- |                       |                       |                       |                       |                       |
|-----------------------|-----------------------|-----------------------|-----------------------|-----------------------|
| Very Unsatisfied      | Unsatisfied           | Neutral               | Satisfied             | Very Satisfied        |
| <input type="radio"/> | <input type="radio"/> | <input type="radio"/> | <input type="radio"/> | <input type="radio"/> |

8. This process helped me understand my cancer treatment options better:

- |                       |                       |                       |                       |                       |
|-----------------------|-----------------------|-----------------------|-----------------------|-----------------------|
| Strongly Disagree     | Disagree              | Neutral               | Agree                 | Strongly Agree        |
| <input type="radio"/> | <input type="radio"/> | <input type="radio"/> | <input type="radio"/> | <input type="radio"/> |

9. This process gave me more confidence in my doctor:

Strongly Disagree

Disagree

Neutral

Agree

Strongly Agree
